# Supplementary material
Source: MDPI journal article supplement (https://www.mdpi.com/2075-163X/8/10/442)
Supplement: s1 [file s1]

## Sheet: S1 - Feldspar
Table S1. Complete dataset for the EMPA and chemical formulae of feldspar from Isadalu magmatic complex
Rock	Andesite																		Granitoid
Sample	FP-FPSC																		VG-VGFR
Type	Primary															Secondary			Primary								Secondary
Spot	#62	#63	#64	#65	#66	#161	#163	#61	#72	#73	#76	#26	#28	#37	#38	#42	#43		#101	#102	#103	#104	#44	#45	#46	#47	#109	#110	#138	#139
SiO2 (wt%)	54.41	56.75	53.28	57.75	49.83	50.87	49.72	48.59	48.21	47.07	49.86	66.67	64.26	65.99	65.36	66.04	67.76		66.86	66.34	67.61	68.11	63.54	66.24	64.73	63.95	68.75	67.52	67.86	68.16
Al2O3	27.36	26.76	27.47	25.82	28.91	28.45	29.2	32.29	30.96	31.13	30.12	17.48	17.12	17.63	17.11	20.4	20		16.46	17.54	17.59	16.02	17.51	17.91	17.44	17.21	15.17	18.91	19.29	19.19
FeOt	0.2151	0.1616	0.0962	0.1539	0.3292	0.7287	0.6565	0.1789	0.4486	0.5851	0.8216	0.2142	0.3275	0.4648	0.6055	0.1553	0.2308		0.0659	0.0668	0.1267	0.041	0.119	0.1881	0.1361	0.0903	0.2593	0.2239	0.1392	0.0972
CaO	10.65	9.9	11.2	9.37	14.19	13.71	14.21	16.46	16.02	16.55	14.71	0	0.0528	0.0731	0.0535	2.13	1.68		3.22	3.55	3.4	3.25	0	0.0455	0.0017	0.0314	2	1.58	1.49	1.77
Na2O	6.06	6.48	5.57	6.93	3.49	4.14	3.68	2.25	2.42	2.1	3.32	0.8044	0.7708	0.1591	0.2632	11.66	11.81		11.52	11.15	11.16	11.26	0.6457	0.6613	0.9749	0.483	11.75	11.97	11.58	11.53
K2O	0.3074	0.3886	0.3327	0.213	0.8248	0.1539	0.1473	0.0801	0.1133	0.0931	0.1462	15.82	15.64	16.48	16.52	0.1635	0.1707		0.214	0.1688	0.2003	0.1047	15.89	16.33	16.07	16.32	0.1118	0.0923	0.1051	0.1575
Total	99.0025	100.44	97.9489	100.237	97.574	98.0526	97.6138	99.849	98.1719	97.5282	98.9778	100.989	98.1711	100.797	99.9122	100.549	101.652		98.3399	98.8156	100.087	98.7857	97.7047	101.375	99.3527	98.0847	98.0411	100.296	100.464	100.905
Si	2.48816	2.54683	2.46291	2.59115	2.33765	2.36664	2.32606	2.22945	2.24778	2.21665	2.30284	3.03925	3.02441	3.02422	3.0247	2.90215	2.93735		3.00999	2.97261	2.98633	3.04301	3.0052	3.01894	3.01604	3.02083	3.08341	2.96449	2.96673	2.97081
Al	1.47459	1.41539	1.49657	1.36538	1.59843	1.55994	1.61001	1.74612	1.70127	1.72778	1.63954	0.939147	0.94964	0.952232	0.933204	1.05657	1.0218		0.873341	0.926293	0.915689	0.843549	0.976042	0.962024	0.95771	0.958125	0.801863	0.978507	0.993921	0.985772
Fe3+	0.00822615	0.00606502	0.0037189	0.00577478	0.0129153	0.0283514	0.0256851	0.00686463	0.0174917	0.023043	0.0317343	0.00816605	0.0128904	0.0178138	0.0234337	0.00570743	0.00836708		0.00248107	0.0025032	0.00468014	0.00153191	0.00470684	0.00716935	0.0053033	0.00356721	0.00972563	0.00822104	0.00508932	0.00354297
Ca	0.521823	0.47604	0.554721	0.450457	0.713255	0.683408	0.71229	0.809196	0.800299	0.835073	0.727944	0	0.0026626	0.00358943	0.00265276	0.100292	0.0780306		0.15532	0.170437	0.160908	0.155578	0	0.00222187	8.48699e-05	0.00158924	0.0961086	0.0743271	0.0697949	0.0826594
Na	0.537304	0.563841	0.499213	0.602866	0.31744	0.373437	0.333799	0.200161	0.218765	0.191743	0.297301	0.0710977	0.0703377	0.0141368	0.0236158	0.993478	0.992611		1.00554	0.96869	0.955735	0.975388	0.0592113	0.058436	0.0880722	0.0442364	1.02175	1.01896	0.981566	0.974365
K	0.0179334	0.0222483	0.0196198	0.0121921	0.0493624	0.00913412	0.00879126	0.00468859	0.00673915	0.00559322	0.00861426	0.920029	0.939063	0.963497	0.975302	0.0091662	0.00944005		0.0122905	0.00964926	0.0112867	0.00596757	0.958759	0.949466	0.955226	0.983477	0.00639675	0.00516984	0.00586172	0.00875759
(a) An (%)	0.484488	0.448194	0.516715	0.42276	0.660386	0.641109	0.675233	0.797988	0.780168	0.808859	0.704103	0	0	0	0	0.0909317	0.0722451		0.132396	0.148364	0.142658	0.13	0	0	0	0	0.08	0.0676649	0.06	0.0775575
(a) Ab (%)	0.498861	0.530859	0.46501	0.565798	0.29391	0.350323	0.316433	0.197389	0.213263	0.185724	0.287565	0.0717342	0.0694993	0.02	0.03	0.900758	0.919015		0.857127	0.843236	0.847335	0.857911	0.058166	0.0578503	0.0844102	0.042977	0.908824	0.927629	0.928438	0.914225
(a) Or (%)	0.0166503	0.0209469	0.0182756	0.0114425	0.0457035	0.00856876	0.00833389	0	0.00656963	0.00541763	0.00833214	0.928266	0.92787	0.981935	0.973773	0.00831072	0.00874013		0.0104766	0.0083996	0.0100065	0.00524883	0.941834	0.93995	0.915508	0.955479	0.00568978	-	0.00554446	0.00821706
* FeOt total iron reported as FeO; apfu: atoms per formula unit.
(a) Abbreviation used in table to indicate ternary feldspar compounds: An= Anorthite; Ab= Albite; Or= Orthoclase

## Sheet: S2 - Epidote
Table S2. Complete dataset for the EMPA and chemical formulae of epidote from Isadalu magmatic complex
Rock	Andesite														Granitoid
Sample	FP-FPSC														VG-VGFR
Type	Primary				Secondary										Primary				Secondary
Spot	#19	#22	#18	#24	#164	#20	#21	#33	#34	#35	#36	#67	#68		#105	#106	#108	#109	#82	#83	#86	#88
SiO2 (wt%)	38.202	38.08	38.301	35.352	37.83	38.45	38.78	38.99	39.3	36.49	39.36	37.78	38.68		38.33	37.159	37.637	36.485	38.049	37.52	38	39.214
TiO2	0.274306	0.0358	0.276	2.676	0.0204	0.017	0.0273	0.1071	0.0963	0.0185	0.0318	0.059	0.0443		0.1581	0.393	1.065	0.24	0.064	0.0604	0	0.0313
Al2O3	21.345	23.36	25.103	21.96	23.12	26.31	25.98	25.97	24.34	26.13	24.8	23.75	25.44		17.6	20.946	23.751	21.922	25.543	24.21	25.981	26.431
FeOt	14.206	11.35	10.289	10.542	8.78	8.61	7.47	7.68	7.84	6.82	7.72	8.56	7.21		11.93	14.968	11.109	13.131	9.123	8.55	8.69	7.342
MnO	0.252083	0.5911	0.262	0.093	0.4463	0.3575	0.0735	0.1272	0.1069	0.8467	0.4194	0.1561	0.4455		0	0.549	0.183	0.4	0.397	0.7775	0.291	0.3215
MgO	0.006	0.021	0.085	0.371	0.1598	0.004	0.053	0.0697	0.055	0.0771	0.0365	0.0438	0.0688		0.0162	0.218	0.087	0.084	0.035	0.1375	0.149	0.0467
CaO	22.916	22.26	23.381	21.315	22.65	22.79	23.42	23.14	22.71	22.28	22.85	22.5	22.95		22.62	22.593	23.261	21.821	24.21	21.98	23.495	24.222
Na2O	0.04	0.015	0	0.018	0	0.0345	0.0486	0	0.0708	0.0694	0	0.0378	0.0126		0	0	0.028	0	0.007	0.0221	0.039	0
K2O	0.029	0	0	0.022	0	0	0	0.0161	0	0	0	0.0025	0		0	0.045	0.029	0.009	0.035	0.0017	0	0.025
Total	97.2704	95.7129	97.697	92.349	93.0065	96.573	95.8524	96.1001	94.519	92.7317	95.2177	92.8892	94.8512		90.6543	96.871	97.15	94.092	97.463	93.2592	96.645	97.6335
Si (apfu)	3.03589	3.04355	2.99575	2.94007	3.09775	3.01994	3.0639	3.07017	3.14443	2.98341	3.12649	3.09102	3.0852		3.25409	2.97854	2.97549	2.98917	2.98568	3.05695	2.99429	3.04755
Ti	0.016397	0.00215227	0.0162381	0.167401	0.00125652	0.00100434	0.0016224	0.00634349	0.0057957	0.00113773	0.00190002	0.00363096	0.00265785		0.0100961	0.0236952	0.063332	0.0147903	0.00377754	0.00370162	0	0.00182972
Al	1.99918	2.20045	2.31407	2.15244	2.23128	2.43545	2.41914	2.41011	2.29523	2.51788	2.32172	2.29013	2.3915		1.761	1.97877	2.213	2.11676	2.36226	2.32475	2.41281	2.42091
Cr	0	0	0	0	0	0	0	0	0	0	0	0	0		0	0	0	0	0	0	0	0
Fe3+	0.94412	0.75864	0.673015	0.733199	0.601258	0.565537	0.493563	0.505739	0.524593	0.466315	0.512833	0.585693	0.480937		0.847007	1.00336	0.734472	0.899684	0.598678	0.58257	0.572646	0.477178
Mn3+	0.0169679	0.0400157	0.0173573	0.00655106	0.0309544	0.0237828	0.00491858	0.00848363	0.00724458	0.0586347	0.0282174	0.0108175	0.0300975		0	0.0372732	0.0122541	0.0277576	0.0263861	0.0536552	0.0194218	0.021163
Mg	0.000710819	0.00250214	0.00991113	0.0459966	0.0195072	0.00046835	0.00624239	0.00818183	0.00656026	0.00939728	0.00432219	0.00534223	0.00818076		0.00205028	0.0260498	0.0102535	0.0102595	0.00409427	0.0167008	0.0175027	0.00541048
Ca	1.95124	1.90626	1.95944	1.89933	1.98724	1.91787	1.98256	1.9523	1.94689	1.95177	1.94474	1.9724	1.96134		2.05758	1.94038	1.97036	1.91551	2.03548	1.91879	1.98362	2.01694
Na	0.0061632	0.00232446	0	0.00290243	0	0.00525373	0.00744474	0	0.0109832	0.0110013	0	0.00599623	0.00194856		0	0	0.00429189	0	0.00106499	0.00349112	0.0059583	0
(a) XPs	0.32077	0.256376	0.225308	0.254086	0.212268	0.188451	0.169452	0.173445	0.186037	0.156262	0.180922	0.203661	0.167432		0.324772	0.336458	0.249187	0.29826	0.202192	0.20038	0.191812	0.164652
* FeOt total iron reported as FeO; apfu: atoms per formula unit.
(a) XPs: Pistacite, atomic [Fe3+ / (Fe3+ + Al3+)] after [85-87].

## Sheet: S3 - Chlorite
Table S3. Complete dataset for the EMPA and chemical formulae of chlorite from Isadalu magmatic complex
Rock		Andesite									Granitoid
Sample		FP-FPSC									VG-VGFR
Type	chlorite							chloritized-biotite			chlorite												chloritized-biotite
Spot	#53	#54	#55	#56	#57	#58	#59	#60	#61		#96	#97	#98	#99	#100	#106	#111	#112	#113	#133	#134	#135	#14	#15	#16	#17	#18
SiO2 (wt%)	28.71	27.63	26.29	28.63	29.67	28.474	27.868	29.956	29.935		29.29	28.21	28.3	27.18	26.03	27.06	27.79	26.94	27.43	28.24	28.24	29.6	27.8	27.565	29.491	27.864	29.399
TiO2	0.0549	0	0.0161	0.025	0	0.054	0.077	0.112	0.096		0.0121	0	0.2182	0.1397	0.1472	0.0344	0.0653	0.0108	0.0878	0.03	0.0417	0.0279	2.07	1.346	0.105	0.33	0.044
Al2O3	17.24	17.35	19.89	16.79	17.42	18.018	18.372	17.55	18.337		13.5	12.37	16.13	14.85	15.3	17.32	17.12	17.63	17.47	17.06	16.08	16.32	17.78	15.716	16.02	15.952	16.912
FeOt	20.01	19.62	20.3	19.2	19.25	28.736	29.648	28.02	26.279		25.26	25.45	25.59	27.83	27.92	28.85	26.62	27.2	26.62	25.87	24.79	24.47	26.27	31.887	30.023	32.719	26.073
MnO	0.597	0.6495	0.6534	0.4823	0.5945	0.357	0.297	0.357	0.454		0.0684	0	0.1696	0.1121	0.1497	0.1674	0.2782	0.1914	0.2435	0.1764	0.1332	0.1999	0.635	0.203	0.465	0.409	0.263
MgO	19.12	19.11	17.6	18.66	19.28	10.169	10.269	10.1	11.423		15.77	15.58	15.07	13.73	12.77	11.65	13.88	13.56	13.9	14.5	15.55	15.65	10.048	7.965	9.379	8.535	14.382
CaO	0.0348	0.0898	0.0479	0.1033	0.0517	0.162	0.143	0.071	0.215		0.0742	0.054	0.0006	0.0677	0.0766	0.1317	0.1744	0.1231	0.1833	0.1406	0.2097	0.2559	0.186	1.05	0.577	0.309	0.379
Na2O	0.1868	0.069	0.0255	0.0449	0.0031	0.015	0.031	0.017	0.024		0.0245	0	0	0.0557	0.046	0.0465	0.0577	0	0.029	0.0165	0.0596	0.0173	0.07	0.057	0.109	0.053	0.067
K2O	0.0169	0.0125	0.0281	0	0.0146	0.744	0.468	1.753	1.324		0.0049	0	0	0	0.0141	0.0005	0	0	0.0747	0.0261	0.0108	0.0057	0.451	0.96	1.093	0.748	0.268
Total	85.9704	84.5308	84.851	83.9355	86.2839	86.729	87.173	87.936	88.087		84.0041	81.664	85.4784	83.9652	82.4536	85.2605	85.9856	85.6553	86.0383	86.0596	85.115	86.5467	85.31	86.749	87.262	86.919	87.787
Formula (14 oxygens)
Si, (apfu)	2.98937	2.92041	2.7854	2.99326	3.00028	2.98902	2.91958	3.09899	3.06177		3.12862	3.11739	2.97205	2.95027	2.88801	2.89281	2.9168	2.84829	2.87983	2.94682	2.97221	3.04622	2.94528	2.96293	3.10694	2.98591	3.0087
Ti	0.00429872	0	0.00128275	0.00196554	0	0.00426278	0.00606631	0.00871311	0.00738387		0.000971938	0	0.0172323	0.0114032	0.0122815	0.00276548	0.00515408	0.000858677	0.00693194	0.00235413	0.00330043	0.0021592	0.164919	0.1088	0.00831862	0.0265929	0.00338624
Al	2.11562	2.16131	2.48362	2.06884	2.07609	2.22915	2.26843	2.13977	2.21042		1.6995	1.61106	1.99644	1.89973	2.00064	2.1822	2.11776	2.19681	2.16166	2.09808	1.99459	1.97944	2.22007	1.99094	1.98911	2.01466	2.03983
Aliv	1.00633	1.07959	1.21332	1.00477	0.999722	1.00672	1.07435	0.892301	0.930845		0.870406	0.882608	1.01072	1.03833	1.09971	1.10442	1.07804	1.15085	1.11324	1.05082	1.02449	0.95162	0.889805	0.928274	0.884746	0.987498	0.987917
Alvi	1.10929	1.08172	1.2703	1.06407	1.07637	1.22243	1.19408	1.24747	1.27958		0.829093	0.728451	0.985721	0.861398	0.900937	1.07777	1.03971	1.04596	1.04842	1.04725	0.970103	1.02782	1.33026	1.06267	1.10436	1.02716	1.05191
Fe2+	1.63803	1.54366	1.69091	1.15844	1.04197	1.61468	1.66261	1.55161	1.43874		1.44426	1.50541	1.43853	1.61698	1.65814	1.65089	1.49557	1.53934	1.49599	1.44499	1.3966	1.34798	1.48978	1.83466	1.69308	1.87678	1.42829
Fe3+	0.104555	0.19079	0.10793	0.520458	0.586107	0.908256	0.935217	0.872783	0.809291		0.812399	0.846795	0.809173	0.909551	0.932701	0.928625	0.841258	0.86588	0.841495	0.812808	0.785586	0.758239	0.837999	1.032	0.952355	1.05569	0.803413
Mn	0.0526512	0.0581473	0.0586358	0.0427098	0.0509194	0.0317421	0.0263547	0.0312818	0.0393311		0.00618838	0	0.0150863	0.0103063	0.014068	0.0151578	0.0247322	0.0171402	0.0216535	0.015591	0.0118742	0.0174249	0.0569826	0.0184819	0.0414938	0.037123	0.0227976
Mg	2.96785	3.01114	2.77982	2.90832	2.90642	1.59135	1.6038	1.55763	1.74173		2.51115	2.56663	2.35933	2.22172	2.11214	1.85663	2.17178	2.13724	2.17552	2.25561	2.43979	2.40099	1.58697	1.27631	1.47301	1.36346	2.19418
Ca	0.00388226	0.0101695	0.00543739	0.0115713	0.00560135	0.0182202	0.0160513	0.00786959	0.0235608		0.00849172	0.00639352	6.75116e-05	0.00787333	0.00910567	0.0150847	0.0196121	0.0139445	0.0206187	0.0157193	0.0236467	0.0282162	0.0211131	0.120923	0.0651293	0.0354772	0.0415569
Na	0.0377113	0.0141403	0.00523823	0.00910159	0.00060779	0.00305294	0.00629686	0.00340983	0.0047594		0.00507397	0	0	0.0117223	0.00989533	0.00963814	0.011742	0	0.00590319	0.00333827	0.0121621	0.00345194	0.0143789	0.0118792	0.0222647	0.0110118	0.0132944
K	0.0022449	0.00168553	0.0037981	0	0.00188348	0.099636	0.0625496	0.231356	0.172761		0.000667718	0	0	0	0.00199576	6.81908e-05	0	0	0.0100052	0.00347451	0.00145011	0.000748356	0.0609567	0.131643	0.146902	0.102258	0.03499
(a) XFe3+	0.06	0.11	0.06	0.31	0.36	0.36	0.36	0.36	0.36		0.36	0.36	0.36	0.36	0.36	0.36	0.36	0.36	0.36	0.36	0.36	0.36	0.36	0.36	0.36	0.36	0.36
(b) XMg	0.644361	0.661091	0.621782	0.715144	0.736103	0.496362	0.490998	0.500967	0.547633		0.634864	0.630305	0.621227	0.578769	0.560209	0.529329	0.592193	0.581312	0.592541	0.609525	0.63596	0.64044	0.515794	0.410261	0.465247	0.420791	0.605714
(c) T (°C) [± 30°C]	262.092	285.68	328.739	261.591	259.965	262.219	283.994	225.378	237.788		218.328	222.257	263.506	272.396	292.157	293.676	285.182	308.625	296.514	276.419	267.94	244.477	224.574	236.96	222.945	256.029	256.164
* FeOt total iron reported as FeO; apfu: atoms per formula unit.
(a) XFe3+ as [Fe3+ / (Fe3+ + Fe2+)] with Fe3+ in Chl estimates using the stoichiometric criteria given in Vidal et al. (2005) [71].
(b) XMg as [Mg / (Mg + Fe2+)].
(c) T calculated using Al(IV)-in-Chlorite thermometry (Cathelineau, 1988) [99].

## Sheet: S4 - Amphibole
Table S4. Complete dataset for the EMPA and chemical formulae of amphibole from Isadalu magmatic complex
Rock		Andesite
Sample		FP-FPSC
Type		Primary																							Secondary
Spot		#1	#2	#3	#4	#5	#6	#7	#8	#9	#31	#32	#81	#82	#83	#90	#41	#156	#34	#39	#48	#49	#82	#172	#10	#41	#1	#2	#3	#4	#5	#6	#7	#8	#9	#10	#11	#12	#13	#14	#15	#16	#17	#18	#19	#23	#24	#25	#40
SiO2 (wt%)		46.266	47.369	47.873	47.704	43.075	44.057	47.351	47.362	46.611	50.188	48.414	45.413	46.1654	47.6086	42.3438	54.95	42.29	50.781	54.49	52.33	51.1	50.64	50.6302	51.762	53.371	49.66	50.72	49.53	50.5	51.54	49.27	51.57	52	52.1	52.27	53.11	52.55	53.06	52.03	52.65	54.76	54.89	54.73	53.15	54.4	54.24	54.78	51.53
TiO2		1.408	1.545	1.279	1.454	3.036	1.53	1.302	1.317	0.978	0.118	1.816	1.4601	1.5403	1.4251	3.4715	0.0503	1.96	0.014	0.0248	0.0805	0.0227	0.1175	0.0314	0.034	0.077	0.0023	0	0.0331	0.0433	0.0125	0.0148	0	0	0	0.0112	0.017	0.0225	0	0	0	0.0556	0.0669	0.0474	0.0998	0.0755	0.0779	0.0981	0.0619
Al2O3		8.277	7.559	7.626	7.364	11.873	10.803	7.569	7.49	10.089	6.457	9.376	9.7966	7.7299	7.2675	11.6058	8.26	14.12	4.123	4.54	4.34	4.33	4.73	4.1655	2.766	2.407	2.04	2.21	3.15	3.06	1.8431	4.34	2.67	3.59	4.28	3.15	4.14	3.08	4.29	3.14	2.9	2.41	2.59	2.54	2.5	2.65	3.46	2.93	4.18
FeOt		16.249	17.109	16.9	16.432	11.8	14.273	17.295	16.906	16.112	13.023	11.851	14.7835	16.9211	16.6719	12.4833	10.92	7.72	18.923	11.3	13.22	19.67	15.72	18.8211	15.086	16.048	25.65	25.7	23.56	23.04	25.3	22.59	21.32	17.52	17.74	16.35	16.65	17.95	18.58	18.17	17.89	13.4	12.82	13.77	14.02	10.43	11.49	10.82	16.37
MnO		0.396	0.265	0.323	0.329	0.232	0.321	0.468	0.393	0.463	0.513	0.329	0.3647	0.3898	0.3315	0.1771	0.2913	0.0846	0.842	0.3846	0.593	0.9317	0.6478	0.9401	0.847	1.068	1.41	1.92	1.41	1.4	2.41	1.0751	1.1877	0.7214	0.699	0.6861	0.5573	0.729	0.7616	0.7678	0.6907	0.6166	0.6741	0.6021	0.7603	0.3471	0.4456	0.4494	0.7751
MgO		11.978	11.968	11.822	12.275	13.985	12.978	12.226	12.445	9.856	15.573	14.47	11.4665	11.9675	12.1986	13.2813	11.71	14.96	10.714	14.52	14.68	10.21	11.91	10.9151	12.861	12.543	5.97	5.75	6.84	7.67	5.4	7.49	9.11	11.23	10.54	11.58	11.17	11.33	9.72	10.81	11.04	14.73	14.52	14.47	12.99	16.3	15.51	15.45	10.95
CaO		10.373	10.558	10.768	10.606	11.338	10.89	10.451	10.71	9.506	10.693	11.665	11.7318	10.8714	10.9692	11.4606	9.69	11.08	11.969	11.71	12.43	12.09	11.88	12.4313	11.898	12.496	12.01	12.11	11.95	12.24	11.88	12.27	12.59	12.26	12.1	12.28	12.33	11.98	12.33	12.16	11.91	12.33	12.65	12.14	12.34	12.55	12.95	12.4	12.25
Na2O		1.371	1.222	1.234	1.258	1.795	1.783	1.224	1.297	1.473	0.438	1.098	1.0198	1.3348	1.2204	2.1296	0.3883	2.26	0.29	0.7702	0.4004	0.496	0.3748	0.2872	0.139	0.123	0.1822	0.1098	0.2381	0.2142	0.0657	0.2261	0.1849	0.2245	0.1526	0.1269	0.1153	0.1613	0.2206	0.1072	0.1455	0.1155	0.1113	0.1589	0.1876	0.2587	0.2292	0.2924	0.4306
K2O		0.79	0.594	0.596	0.563	0.871	0.753	0.569	0.629	2.206	0.128	0.221	0.8644	0.614	0.6028	0.7886	3.76	0.429	0.278	0.1667	0.1628	0.3036	0.2946	0.2512	0.199	0.146	0.1087	0.1629	0.2723	0.2659	0.1571	0.245	0.1569	0.1135	0.0984	0.0806	0.0586	0.1175	0.1378	0.1385	0.1	0.0902	0.0806	0.0976	0.0827	0.1041	0.1662	0.1311	0.1852
Total		97.108	98.189	98.421	97.985	98.005	97.388	98.455	98.549	97.294	97.131	99.24	96.9004	97.5342	98.2956	97.7416	100.02	94.9036	97.934	97.9063	98.2367	99.154	96.3147	98.4731	95.592	98.279	97.0332	98.6827	96.9835	98.4334	98.6084	97.521	98.7895	97.6594	97.71	96.5348	98.1482	97.9203	99.1	97.3235	97.3262	98.5079	98.4029	98.556	96.1304	97.1154	98.5689	97.351	96.7328
Normalization Scheme: 13-CNK
Si, apfu		6.769	6.856	6.926	6.906	6.204	6.4	6.814	6.826	6.902	7.059	6.797	6.722	6.762	6.903	6.183	7.68	6.161	7.488	7.743	7.48	7.491	7.502	7.448	7.686	7.77	7.721	7.756	7.632	7.631	7.877	7.503	7.694	7.661	7.672	7.757	7.733	7.7	7.729	7.713	7.771	7.795	7.836	7.788	7.833	7.78	7.7	7.826	7.653
Al		1.231	1.144	1.074	1.094	1.796	1.6	1.186	1.174	1.098	0.941	1.203	1.278	1.238	1.097	1.817	0.32	1.839	0.512	0.257	0.52	0.509	0.498	0.552	0.314	0.23	0.279	0.244	0.368	0.369	0.123	0.497	0.306	0.339	0.328	0.243	0.267	0.3	0.271	0.287	0.229	0.205	0.164	0.212	0.167	0.22	0.3	0.174	0.347
ST		8	8	8	8	8	8	8	8	8	8	8	8	8	8	8	8	8	8	8	8	8	8	8	8	8	8	8	8	8	8	8	8	8	8	8	8	8	8	8	8	8	8	8	8	8	8	8	8
Ti		0.155	0.168	0.139	0.158	0.329	0.167	0.141	0.143	0.109	0.012	0.192	0.163	0.17	0.155	0.381	0.005	0.215	0.002	0.003	0.009	0.003	0.013	0.003	0.004	0.008	-	-	0.004	0.005	0.001	0.002	-	-	-	0.001	0.002	0.002	-	-	-	0.006	0.007	0.005	0.011	0.008	0.008	0.011	0.007
Al		0.196	0.146	0.227	0.163	0.219	0.249	0.098	0.098	0.662	0.129	0.349	0.431	0.096	0.145	0.181	1.04	0.585	0.205	0.503	0.211	0.239	0.328	0.17	0.17	0.183	0.095	0.154	0.205	0.176	0.209	0.282	0.164	0.285	0.415	0.308	0.443	0.232	0.466	0.262	0.276	0.199	0.272	0.214	0.267	0.227	0.278	0.319	0.384
Fe3+		0.938	0.934	0.774	0.867	0.759	0.985	1.138	1.005	0.362	1.422	0.622	0.344	0.897	0.778	0.537	-	0.647	0.387	-	0.344	0.269	0.209	0.327	0.274	0.069	0.105	0.058	0.085	0.105	-	0.093	0.034	0.098	0.034	-	-	0.233	-	0.105	0.125	0.185	-	0.224	-	0.039	-	-	-
Mn2+		0.049	0.032	0.04	0.04	0.028	0.039	0.057	0.048	0.058	0.061	0.039	0.046	0.048	0.041	0.022	0.034	0.01	0.105	0.046	0.072	0.116	0.081	0.117	0.107	0.132	0.186	0.249	0.184	0.179	0.312	0.139	0.15	0.09	0.087	0.086	0.069	0.09	0.094	0.096	0.086	0.074	0.082	0.073	0.095	0.042	0.054	0.054	0.097
Fe2+		1.05	1.137	1.271	1.122	0.662	0.748	0.944	1.032	1.633	0.11	0.77	1.486	1.176	1.244	0.988	1.276	0.293	1.946	1.343	1.237	2.142	1.738	1.989	1.6	1.885	3.23	3.229	2.952	2.807	3.234	2.784	2.626	2.061	2.151	2.029	2.027	1.967	2.264	2.148	2.083	1.41	1.531	1.414	1.728	1.208	1.364	1.293	2.033
Mg		2.612	2.582	2.55	2.649	3.003	2.81	2.623	2.674	2.176	3.265	3.029	2.53	2.613	2.637	2.891	2.44	3.249	2.355	3.076	3.128	2.231	2.63	2.394	2.847	2.722	1.384	1.311	1.571	1.728	1.23	1.7	2.026	2.467	2.314	2.562	2.424	2.475	2.111	2.389	2.429	3.126	3.09	3.07	2.854	3.475	3.282	3.29	2.424
SC		5	4.999	5.001	4.999	5	4.998	5.001	5	5	4.999	5.001	5	5	5	5	4.795	4.999	5	4.971	5.001	5	4.999	5	5.002	4.999	5	5.001	5.001	5	4.986	5	5	5.001	5.001	4.986	4.965	4.999	4.935	5	4.999	5	4.982	5	4.955	4.999	4.986	4.967	4.945
Ca		1.626	1.637	1.669	1.645	1.75	1.695	1.611	1.654	1.508	1.611	1.755	1.861	1.706	1.704	1.793	1.451	1.729	1.891	1.783	1.904	1.899	1.886	1.959	1.893	1.949	2	1.984	1.973	1.982	1.945	2	2	1.935	1.909	1.953	1.923	1.881	1.924	1.931	1.884	1.88	1.935	1.851	1.949	1.923	1.97	1.898	1.949
Na		0.374	0.343	0.331	0.353	0.25	0.305	0.342	0.346	0.423	0.119	0.245	0.139	0.294	0.296	0.207	0.105	0.271	0.083	0.212	0.096	0.101	0.108	0.041	0.04	0.035		0.016	0.027	0.018	0.019			0.064	0.044	0.037	0.033	0.046	0.062	0.031	0.042	0.032	0.031	0.044	0.051	0.072	0.03	0.081	0.051
SB		2	1.98	2	1.998	2	2	1.953	2	1.931	1.73	2	2	2	2	2	1.556	2	1.974	1.995	2	2	1.994	2	1.933	1.984	2	2	2	2	1.964	2	2	1.999	1.953	1.99	1.956	1.927	1.986	1.962	1.926	1.912	1.966	1.895	2	1.995	2	1.979	2
Ca																									-	-	0.001	-	-	-	-	0.002	0.013	-	-	-	-	-	-	-	-	-	-	-	-	-	-	-	-
Na		0.015	-	0.015	-	0.251	0.197	-	0.016	-	-	0.054	0.153	0.085	0.047	0.396	-	0.368	-	-	0.015	0.04	-	0.041	-	-	0.055	0.017	0.044	0.045	-	0.067	0.053	-	-	-	-	-	-	-	-	-	-	-	0.002	-	0.033	-	0.073
K		0.147	0.11	0.11	0.104	0.16	0.14	0.104	0.116	0.417	0.023	0.04	0.163	0.115	0.112	0.147	0.67	0.08	0.052	0.03	0.03	0.057	0.056	0.047	0.038	0.027	0.022	0.032	0.054	0.051	0.031	0.048	0.03	0.021	0.018	0.015	0.011	0.022	0.026	0.026	0.019	0.016	0.015	0.018	0.016	0.019	0.03	0.024	0.035
SA		0.162	0.11	0.125	0.104	0.411	0.337	0.104	0.132	0.417	0.023	0.094	0.316	0.2	0.159	0.543	0.67	0.448	0.052	0.03	0.045	0.097	0.056	0.088	0.038	0.027	0.078	0.049	0.098	0.096	0.031	0.117	0.096	0.021	0.018	0.015	0.011	0.022	0.026	0.026	0.019	0.016	0.015	0.018	0.018	0.019	0.063	0.024	0.108
O (non-W)		22	22	22	22	22	22	22	22	22	22	22	22	22	22	22	22	22	22	22	22	22	22	22	22	22	22	22	22	22	22	22	22	22	22	22	22	22	22	22	22	22	22	22	22	22	22	22	22
W (OH)		2	2	2	2	2	2	2	2	2	2	2	2	2	2	2	2	2	2	2	2	2	2	2	2	2	2	2	2	2	2	2	2	2	2	2	2	2	2	2	2	2	2	2	2	2	2	2	2
S(T, C, B, A)		15.162	15.089	15.126	15.101	15.411	15.335	15.058	15.132	15.348	14.752	15.095	15.316	15.2	15.159	15.543	15.021	15.447	15.026	14.996	15.046	15.097	15.049	15.088	14.973	15.01	15.078	15.05	15.099	15.096	14.981	15.117	15.096	15.021	14.972	14.991	14.932	14.948	14.947	14.988	14.944	14.928	14.963	14.913	14.973	15.013	15.049	14.97	15.053
(a)Species		MgHbl	MgHbl	MgHbl	MgHbl	Tschk	Tschk	Tschk	MgHbl	MgHbl	Tschk	MgHbl	MgHbl	MgHbl	MgHbl	MgHbl	Prg	Tschk	MgHbl	MgHbl	MgHbl	MgHbl	MgHbl	MgHbl	Act	Act	Fe-Act	Fe-Act	Fe-Act	Fe-Act	Fe-Act	Fe-Act	Fe-Act	Act	Act	Act	Act	Act	Fe-Act	Act	Act	Act	Act	Act	Act	Act	Act	Act	Act
Altot		1.427	1.29	1.301	1.257	2.015	1.849	1.284	1.272	1.76	1.07	1.552	1.709	1.334	1.242	1.998	1.36	2.424	0.72	0.76	0.734	0.75	0.828	0.723	0.484	0.413	0.374	0.398	0.573	0.545	0.332	0.779	0.47	0.624	0.743	0.551	0.71	0.532	0.737	0.549	0.505	0.404	0.436	0.426	0.434	0.447	0.578	0.493	0.731
(b)P kbar [± 0.5 kbar]		2.99848	2.58277	2.61477	2.48822	5.20689	4.51373	2.56542	2.53093	4.16467	1.99335	3.41037	3.97176	2.71221	2.44595	5.13338	2.79051	7.14874	1.3	1.32627	1.27902	1.30794	1.45622	1.25943	0.893289	0.806419	0.762971	0.78935	1.01635	0.975935	0.719565	1.36166	0.875366	1.09397	1.29522	0.984464	1.23659	0.957701	1.2844	0.981613	0.920905	0.796124	0.833462	0.821575	0.831068	0.846767	1.02373	0.905017	1.27365
(c)T °C [± 30°C]																									426.278	435.944	463.607	414.506	439.111	441.196	461.948	434.347	486.887	426.093	395.849	418.697	390.419	428.942	397.293	410.457	434.034	447.038	444.365	454.254	458.356	462.889	434.865	457.938	437.506
* FeOt total iron reported as FeO; apfu: atoms per formula unit.
(a) Abbreviation used in table: magnesio-hornblende (MgHbl), pargasite (Prg), Tschermakite (Tschk), actinolite (Act), ferro-actinolite (Fe-Act).
(b) Al-in-hornblende (Al-in-Hbl) barometry (Mutch et al., 2016).
(c) Pl-Hbl thermometry (Holland and Blundy, 1994) calculated for secondary amphibole at P derived by Al-in-Hbl barometry and XAb 93%.
[truncated: 61 more columns]
